# Supplementary material
Source: PubMed Central journal article supplement (PMC3091952)
Supplement: NIHMS287956-supplement-1_si_001.pdf [file NIHMS287956-supplement-1_si_001.pdf]

Supporting Information for:

Autodeimination of Protein Arginine Deiminase 4  
alters protein-protein interactions but not activity

*Jessica L. Slack,<sup>1,2‡</sup> Larry E. Jones Jr<sup>1‡</sup>, Monica M. Bhatia,<sup>1</sup> Paul R. Thompson<sup>2\*</sup>*

<sup>1</sup>The Department of Chemistry and Biochemistry, University of South Carolina, 631 Sumter St., Columbia, South Carolina 29208

<sup>2</sup>Department of Chemistry, The Scripps Research Institute, 130 Scripps Way, Jupiter, Florida 33458

E-mail: [pthomps@scripps.edu](mailto:pthomps@scripps.edu)

**RECEIVED DATE (to be automatically inserted after your manuscript is accepted if required according to the journal that you are submitting your paper to)**

---

†This work was supported in part by National Institutes of Health grand GM079357 to PRT.

‡ These authors contributed equally to this work.

\* To whom correspondence should be addressed: Department of Chemistry, The Scripps Research Institute, 130 Scripps Way, Jupiter, Fl, 33458 tel: (561)-228-2471; fax: (561)-228-3050; e-mail: [pthomps@scripps.edu](mailto:pthomps@scripps.edu).

## Supplemental Tables

**Table S1: Primers for PAD4 AD substitution mutants**

| <b>Substitution</b> | <b>Forward Primer</b>                                 |
|---------------------|-------------------------------------------------------|
| R123K               | CTGTGCGCAGACATCACCA <b>A</b> GACCGGCAAAGTGAAGCC       |
| R123Q               | CTGTGCGCAGACATCACCC <b>A</b> GACCGGCAAAGTGAAGCCA      |
| R156K               | GCTGGTGAAGTGTGACA <b>A</b> AGACAATCTCGAATCTTCTGCC     |
| R156Q               | CCTGCTGGTGAAGTGTGACCA <b>A</b> AGACAATCTCGAATCTTCTGCC |
| R205K               | GGTGCTCCACGTGGCCA <b>A</b> GTCTGAGATGGAC              |
| R205Q               | GCTCCACGTGGCCC <b>A</b> GTCTGAGATGGAC                 |
| R372K               | GGTCTTCGACTCTCCAA <b>A</b> GAACAGAGGCCTGAAGG          |
| R372Q               | GGTCTTCGACTCTCCAC <b>A</b> GAACAGAGGCCTGAAGG          |
| R374K               | CGACTCTCCAAGGAACA <b>A</b> AGGCCTGAAGGAG              |
| R374Q               | CGACTCTCCAAGGAACCA <b>A</b> AGGCCTGAAGGAG             |
| R419K               | CCCCAGTCACAGTCA <b>A</b> GGGCAAGGAATACCC              |
| R419Q               | CCCCAGTCACAGTCC <b>A</b> GGGCAAGGAATACCC              |
| R484K               | GCCAGCACCCGACA <b>A</b> GAAGGGCTTCCGGC                |
| R484Q               | GCCAGCACCCGACC <b>A</b> GAAGGGCTTCCGGC                |

\*Reverse primers were reverse complements to forward primers

**Table S2 Steady-state kinetic parameters of PAD4 MCF-7 Cells**

| <b>Sample</b>         | <b><math>k_{cat}</math> (s<sup>-1</sup>)</b> | <b><math>K_m</math> (mM)</b> | <b><math>k_{cat}/K_m</math> (s<sup>-1</sup>M<sup>-1</sup>)</b> |
|-----------------------|----------------------------------------------|------------------------------|----------------------------------------------------------------|
| conPAD4, unstimulated | 0.34 ± 0.026                                 | 0.027 ± 0.0060               | 13000                                                          |
| conPAD4, stimulated   | 0.66 ± 0.042                                 | 0.028 ± 0.0052               | 24000                                                          |
| adPAD4, unstimulated  | 0.40 ± 0.041                                 | 0.037 ± 0.0099               | 11000                                                          |
| adPAD4, stimulated    | 0.67 ± 0.028                                 | 0.027 ± 0.0034               | 25000                                                          |

Recombinant conPAD4 or adPAD4 (2 μM) was incubated in the absence or presence of unstimulated or estradiol-stimulated MC7 cell extracts (2 μg) for 1 h at 37 °C.

---

**Table S3 Citrullinated Arginines**

---

| <b>Residue</b>    | <b>Sequence</b>                   | <b>Predicted mass</b> | <b>Observed mass</b> |
|-------------------|-----------------------------------|-----------------------|----------------------|
| R123 <sup>a</sup> | 106-ALLYLTAVEISLCADITRTGK-126     | 2308.2                | 2309.1               |
| R609 <sup>a</sup> | 595-HLGIPKPFGPVINGR-609           | 1601.9                | 1602.8               |
| R123 <sup>b</sup> | 106-ALLYLTAVEISLCADITR-123        | 2008.1                | 2011.1               |
| R156 <sup>b</sup> | 137-TWTWGPCGQGAILLVNCDR-156       | 2204.0                | 2205.9               |
| R205 <sup>b</sup> | 192-DFFTNHTLVLHVAR-205            | 1669.9                | 1671.8               |
| R419 <sup>c</sup> | 395-GPQTGGISGLDSFGNLEVSPVTVR-419  | 2483.8                | 2484.8               |
| R484 <sup>b</sup> | 462-LYSDWLSVGHVDEFSLFVPAPDR-484   | 2649.3                | 2651.1               |
| R639 <sup>b</sup> | 616-VCSLLEPLGLQCTFINDDFFTYHIR-639 | 2943.3                | 2945.2               |

---

<sup>a</sup>Autodeimination sites determined *in vivo* from enriched endogenous PAD4. <sup>b</sup>Autodeimination sites determined *in vitro* from recombinant PAD4 reconstituted in <sup>18</sup>O-labeled H<sub>2</sub>O.

<sup>c</sup>Autodeimination site determined *in vitro* from recombinant PAD4 in normal H<sub>2</sub>O.

---

**Table S4:** Calcium dependence of PAD4 with HDAC1 1-90

|                                | <i>n</i>        | <i>K</i> <sub>0.5</sub> ( $\mu$ M) |
|--------------------------------|-----------------|------------------------------------|
| wild-type                      | 1.5 $\pm$ 0.19  | 500 $\pm$ 91                       |
| Wild-type + 1 equiv HDAC1 1-90 | 3.4 $\pm$ 0.05  | 620 $\pm$ 3.2                      |
| Wild-type + 2 equiv HDAC1 1-90 | 0.96 $\pm$ 0.41 | 190 $\pm$ 90                       |
| Wild-type + 3 equiv HDAC1 1-90 | 1.0 $\pm$ 0.14  | 600 $\pm$ 130                      |

Values were obtained by incubating protein (0.2  $\mu$ M) and BAEE (10 mM) over a range of calcium concentrations (0-10 mM) at 37 °C for 15 min.

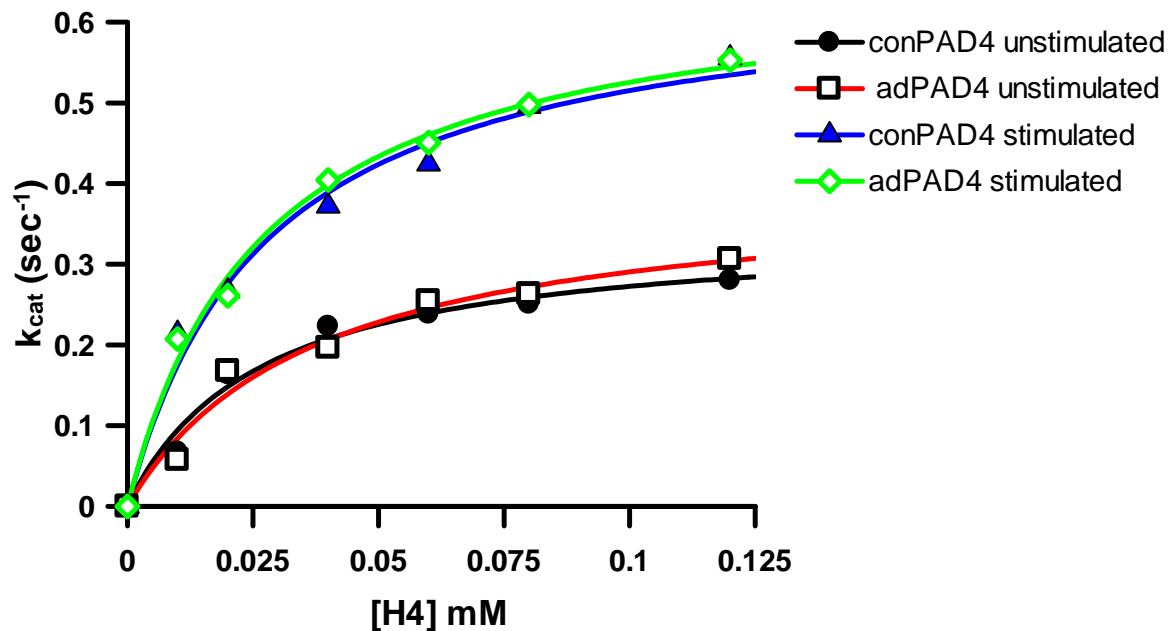

**Figure S1:** (A) Incubation of autodeiminated PAD4 in unstimulated and estradiol-stimulated MCF7 cell extracts. Recombinant PAD4 (2  $\mu$ M) was incubated in the absence or presence of 10 mM calcium for 1 h at 37 °C to generate conPAD4 and adPAD4, respectively. These enzymes were then incubated with unstimulated or estradiol-stimulated MCF7 cell extracts (20  $\mu$ g) for 30 min at 37 °C. The enzymatic activity of conPAD4/unstimulated (black, closed circles), adPAD4/unstimulated (red, open squares), conPAD4/stimulated (green, closed triangles), and adPAD4/stimulated (blue, open diamonds) was assayed using 0.2  $\mu$ M of enzyme and a range of concentrations of histone H4.

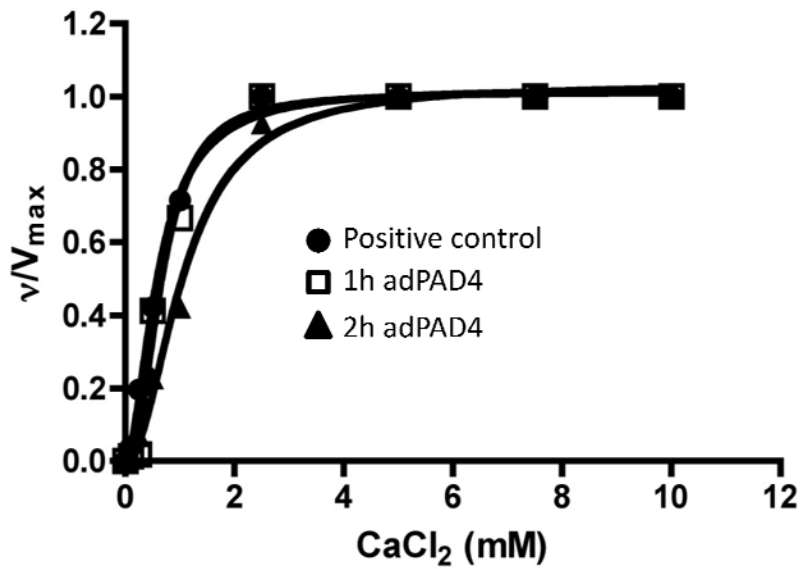

Figure S2: Calcium dependence of adPAD4. Recombinant PAD4 (2  $\mu$ M) was incubated in the presence of 10 mM calcium for 1 h (open squares) or 2 h (closed triangle) to generate 1 h adPAD4 and 2 h adPAD4, respectively. Autodeiminated PAD4 was then dialyzed overnight to remove calcium, at which point the calcium dependence of 1 h adPAD4 and 2 h adPAD4 were determined using a range of calcium concentrations (0-10 mM) in comparison to non-incubated positive control (closed circles). BAEE was used as the substrate.

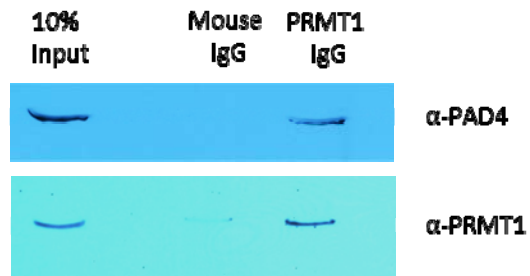

**Figure S3:** Immunoprecipitation of PRMT1 from MCF-7 whole cell extracts (WCE). MCF-7 WCE were incubated with G-sepharose beads crosslinked to either an  $\alpha$ -PRMT1 antibody (Abcam, ab7027) or  $\alpha$ -mouse IgG. Eluted proteins were probed with either an  $\alpha$ -PAD4 (Abcam, ab38772) antibody (*top panel*) or an  $\alpha$ -PRMT1 antibody (*bottom panel*).
